# Supplementary material
Source: publisher site journal article supplement (https://www.spandidos-publications.com/1650/downloadSupplementary)

Figure S1. Amplification plots of formalin-fixed paraffin-embedded samples (tumour and normal) included in one run for all markers. Samples with Ct values  $\geq 36$  were excluded from the analysis.

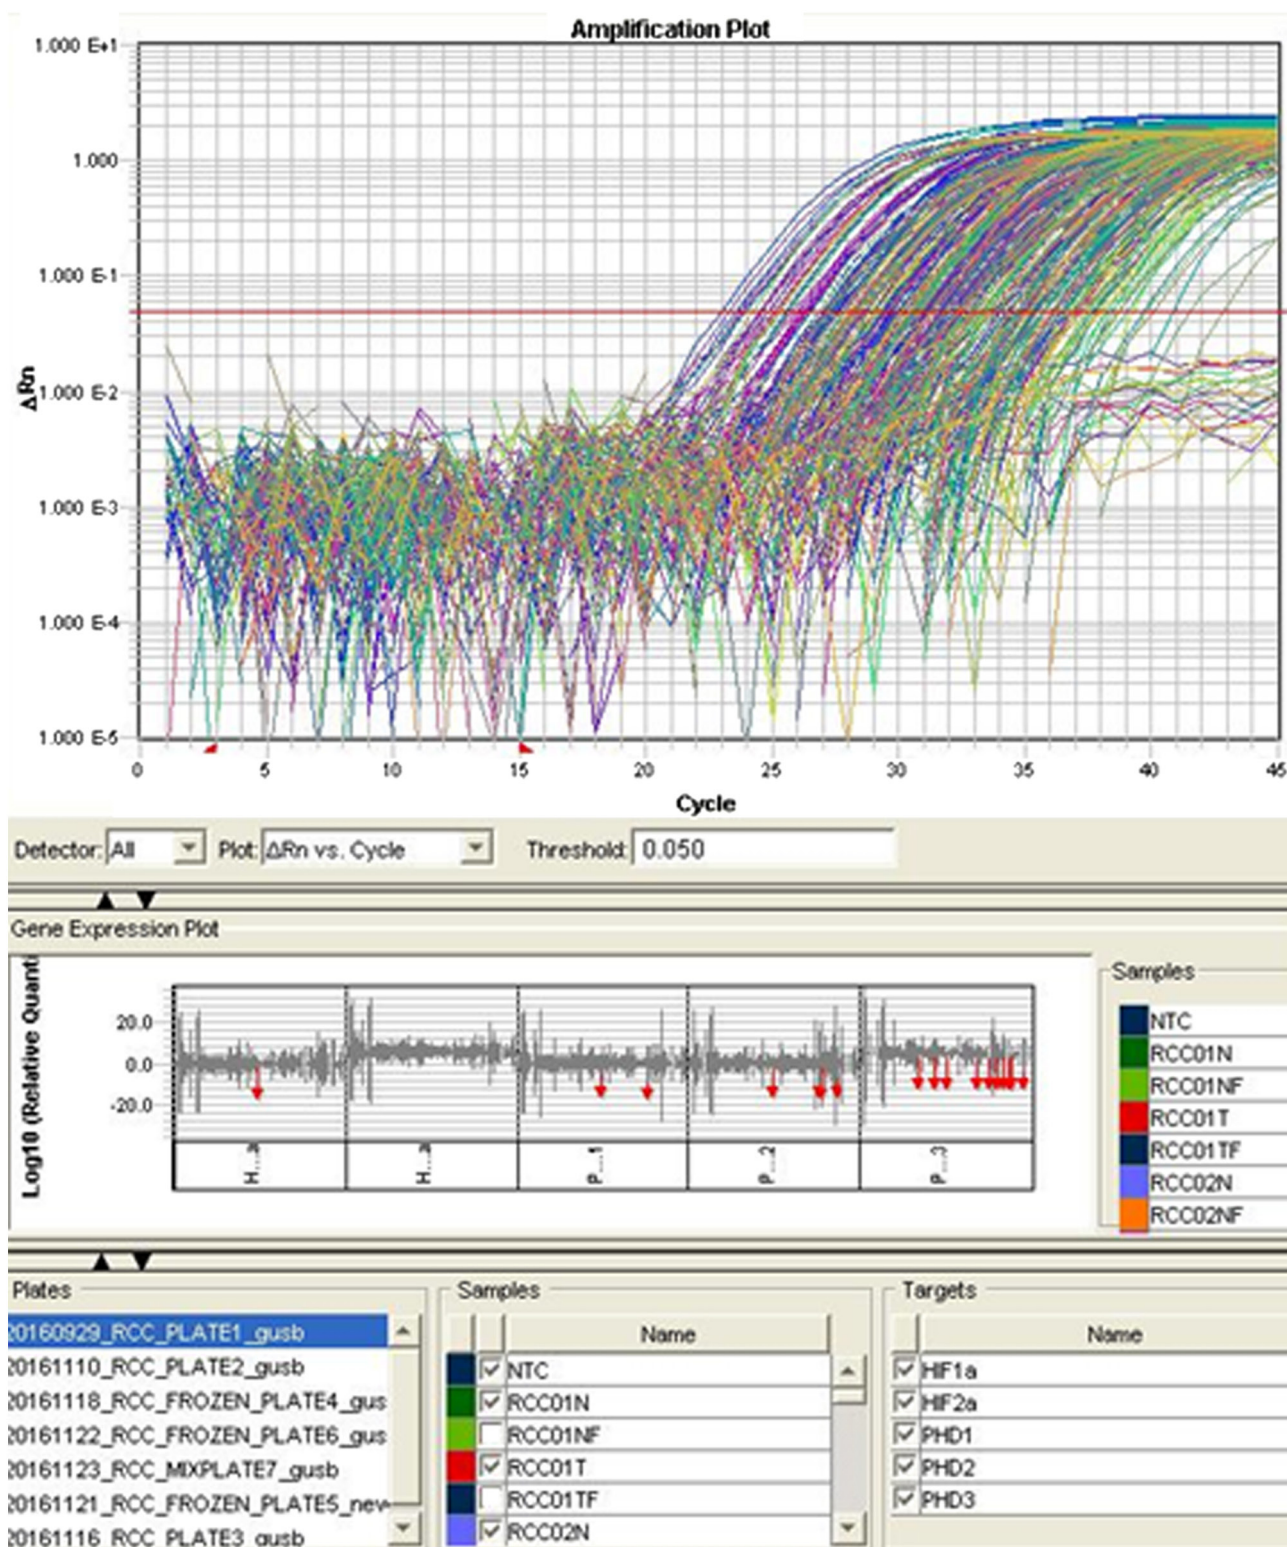

Supplement: Supplementary file 1 [file downloadSupplementary]
